# Supplementary material for: Exosomes from M1‐polarized macrophages promote apoptosis in lung adenocarcinoma via the miR‐181a‐5p/ETS1/STK16 axis
Source: PubMed Central journal article supplement — Cancer Sci. 2022 Jan 28;113(3):986–1001. doi: 10.1111/cas.15268 (PMC8898733; doi:10.1111/cas.15268), 2022-01-28
Supplement: CAS-113-986-s001.pdf [file CAS-113-986-s001.pdf]

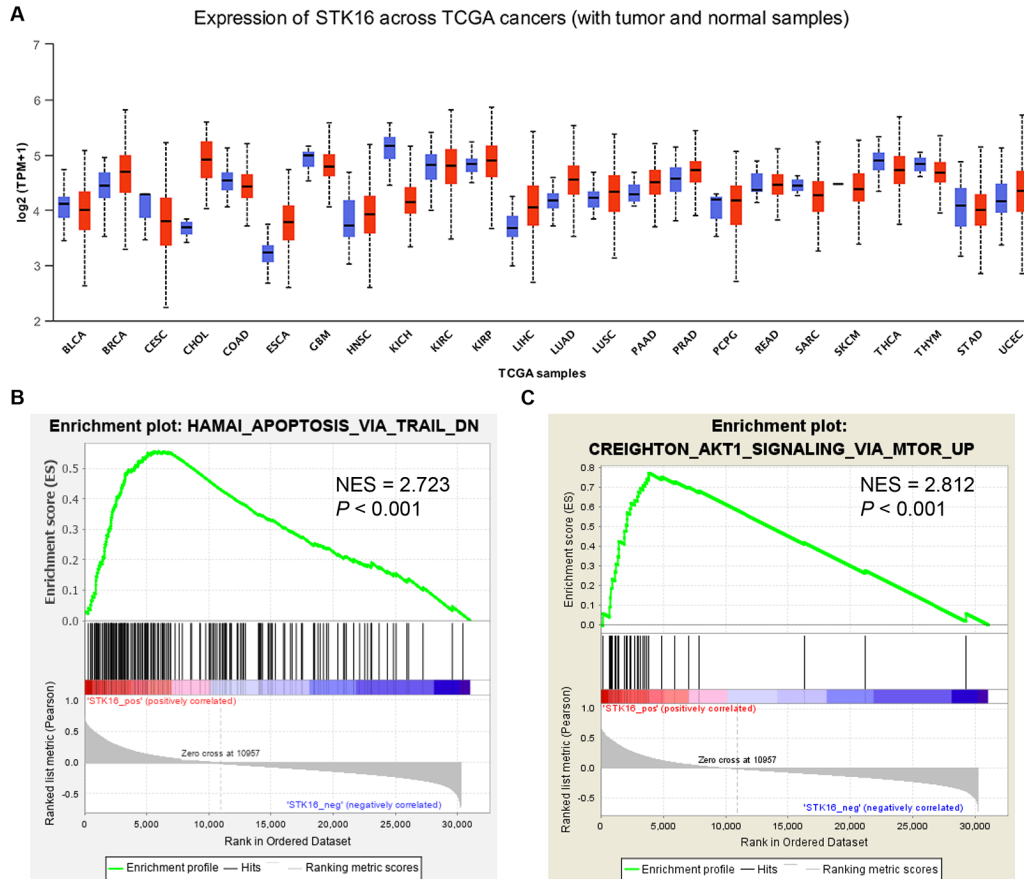

**Figure S1. Bioinformatics analysis of STK16 expression in cancers and its correlation with signaling pathways.** (A) The mRNA expression of STK16 was evaluated in patient samples from 24 TCGA projects. (B-C) GSEA demonstrated STK16 expression was associated with the Apoptosis and AKT1 signaling pathways.

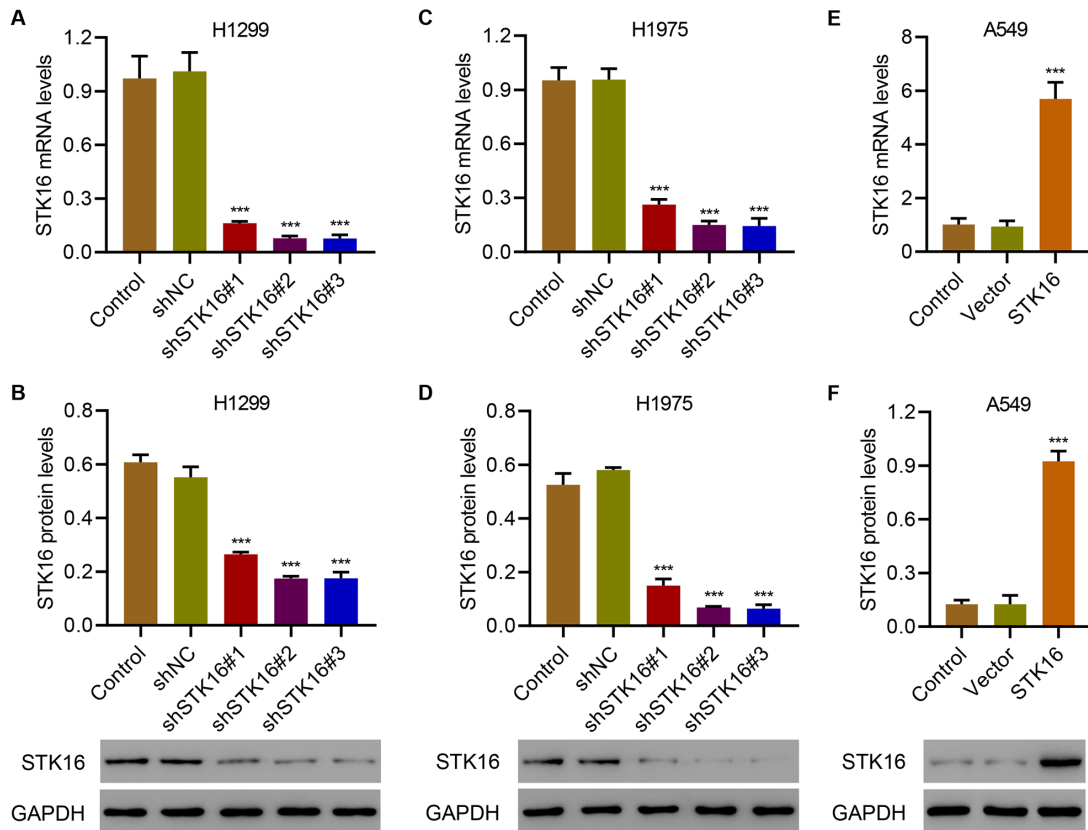

**Figure S2. STK16 silencing and overexpression in LUAD cell lines.** (A-D) STK16 expression in H1299 and H1975 cells transduced with STK16 shRNA vector. (E-F) STK16 expression in A549 cells transduced with STK16 expression vector. \*\*\* $P < 0.001$  compared with shNC or vector.

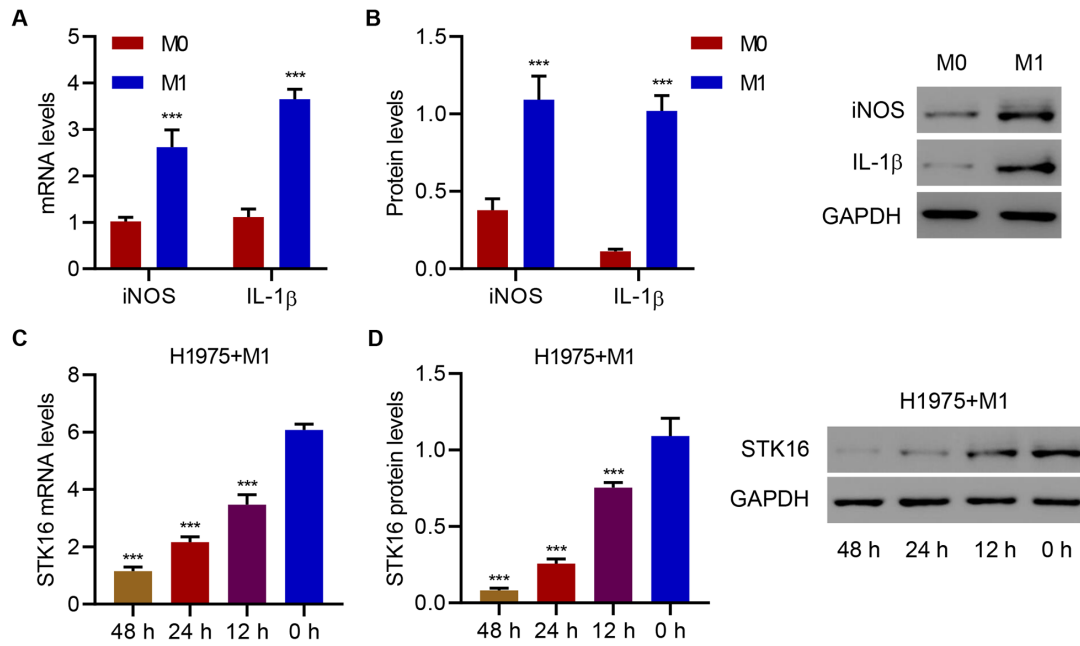

**Figure S3. M1 macrophages inhibit STK16 expression.** (A, B) Polarization of M1 macrophages was characterized by qRT-PCR and Western blotting of the markers. (C, D) STK16 expression in H1975 cells co-cultured with M1 macrophages was analyzed by qRT-PCR and Western blotting. \*\*\* $P < 0.001$  compared with M0 or 0 h.

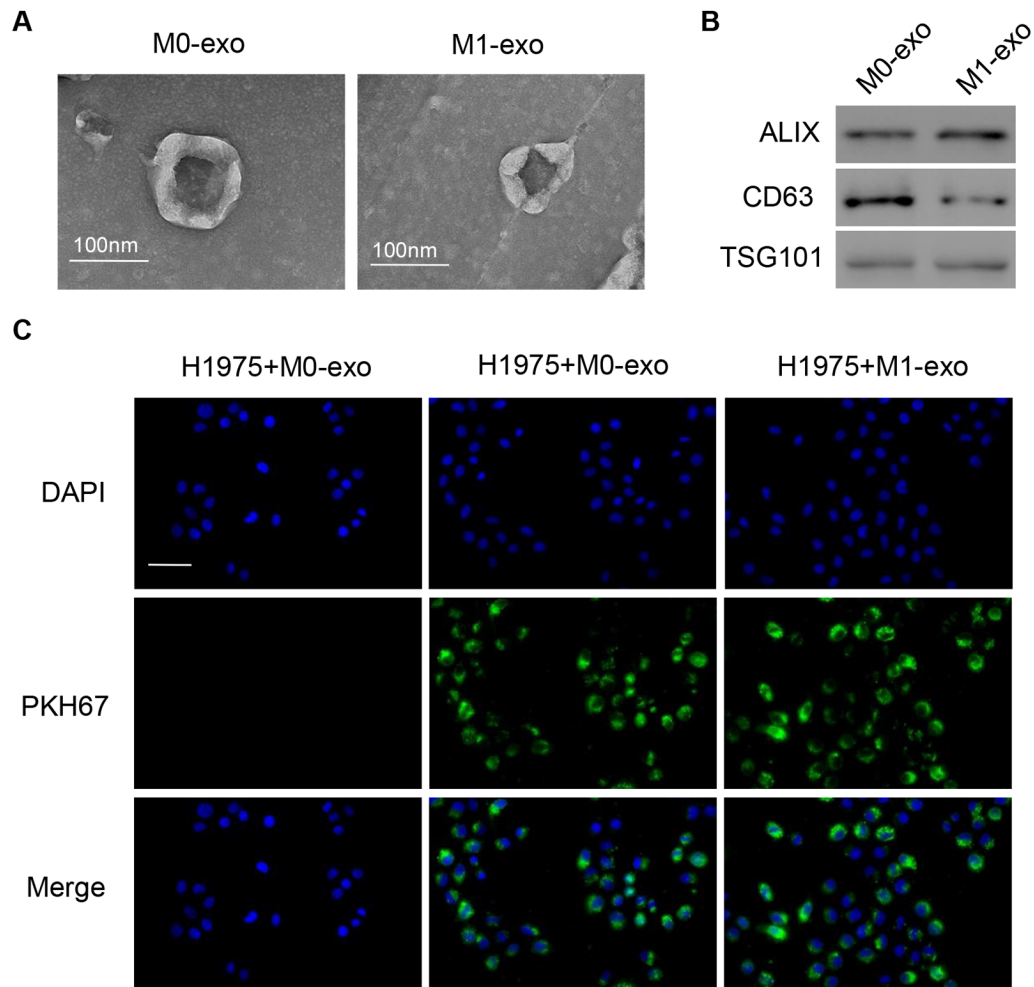

**Figure S4. Characterization and internalization of exosome.** (A) Electron microscopy image of exosome isolated from M0 and M1 macrophages. Scale bar = 100 nm. (B) Western blot analysis of ALIX, CD63, and TSG101 protein expression. (C) Internalization of exosomes by H1975 cells, visualized by laser scanning confocal microscope. Scale bar = 50  $\mu$ m.

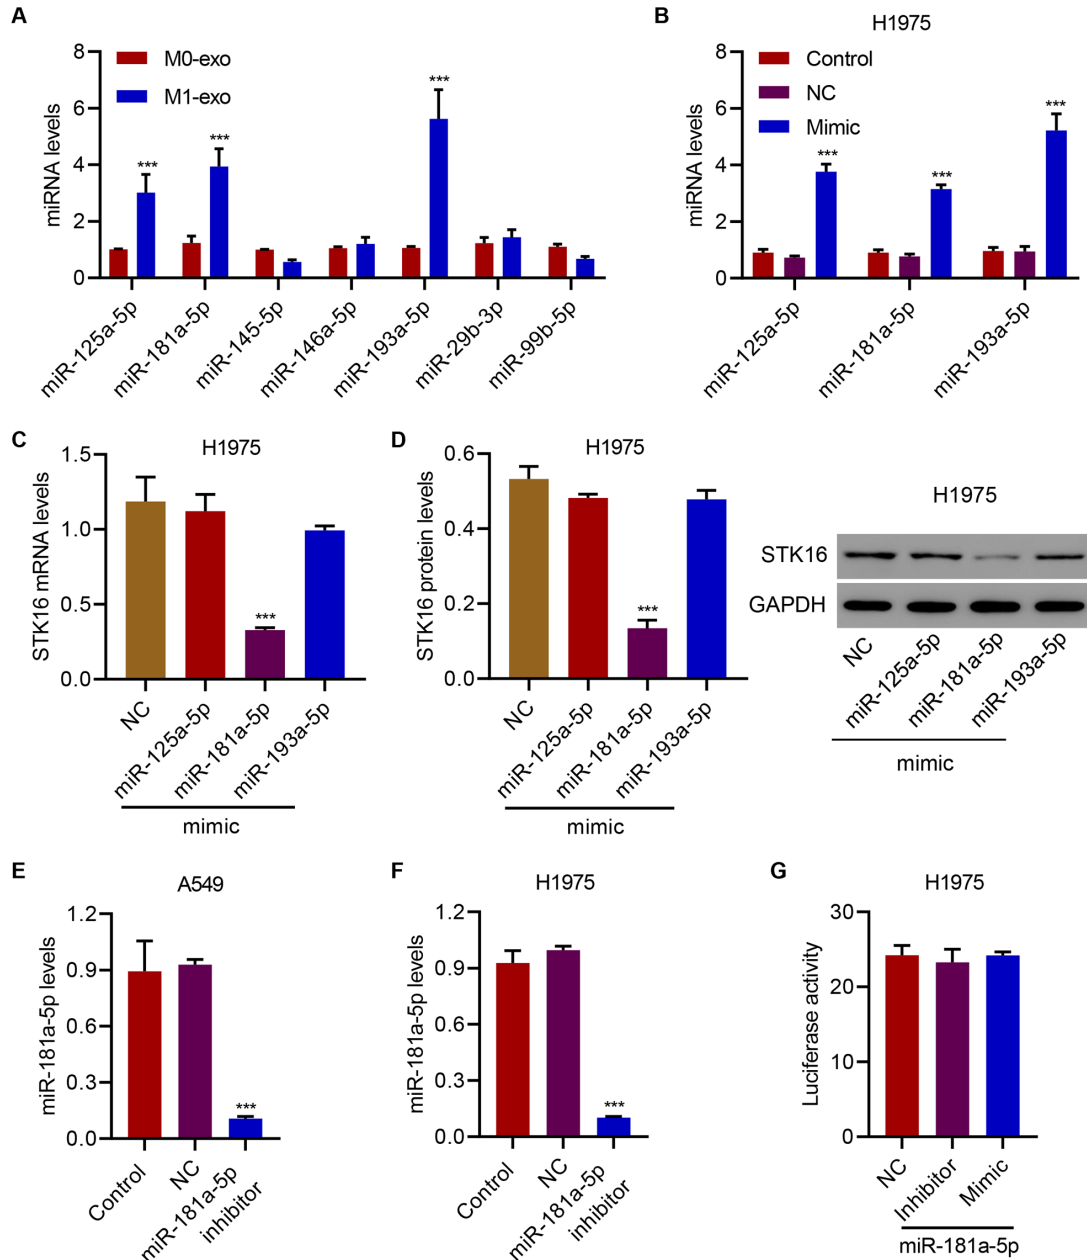

**Figure S5. miR-181a-5p indirectly targets STK16.** (A) Relative expression of miR-125a-5p, miR-181a-5p, miR-145-5p, miR-146a-5p, miR-193a-5p, miR-29b-3p, miR-99b-5p in exosome derived from M0 macrophages (M0-exo) or M1 macrophages (M1-exo). (B) Relative expression of miR-125a-5p, miR-181a-5p and miR-193a-5p in H1975 cells treated with miR-125a-5p, miR-181a-5p, or miR-193a-5p mimic, respectively. (C-D) Relative expression of STK16 in H1975 cells treated with miR-125a-5p, miR-181a-5p, or miR-193a-5p mimic, respectively. (E-F) Relative expression of miR-181a-5p in A549 and H1975 cells treated with miR-181a-5p inhibitor. \*\*\* $P < 0.001$  compared with M0-exo or NC. (G) The luciferase activity of *STK16*

mRNA 3'UTR in H1975 cells transfected with miR-181a-5p mimic or inhibitor.  
 \*\*\* $P < 0.001$  compared with M0-exo or NC.

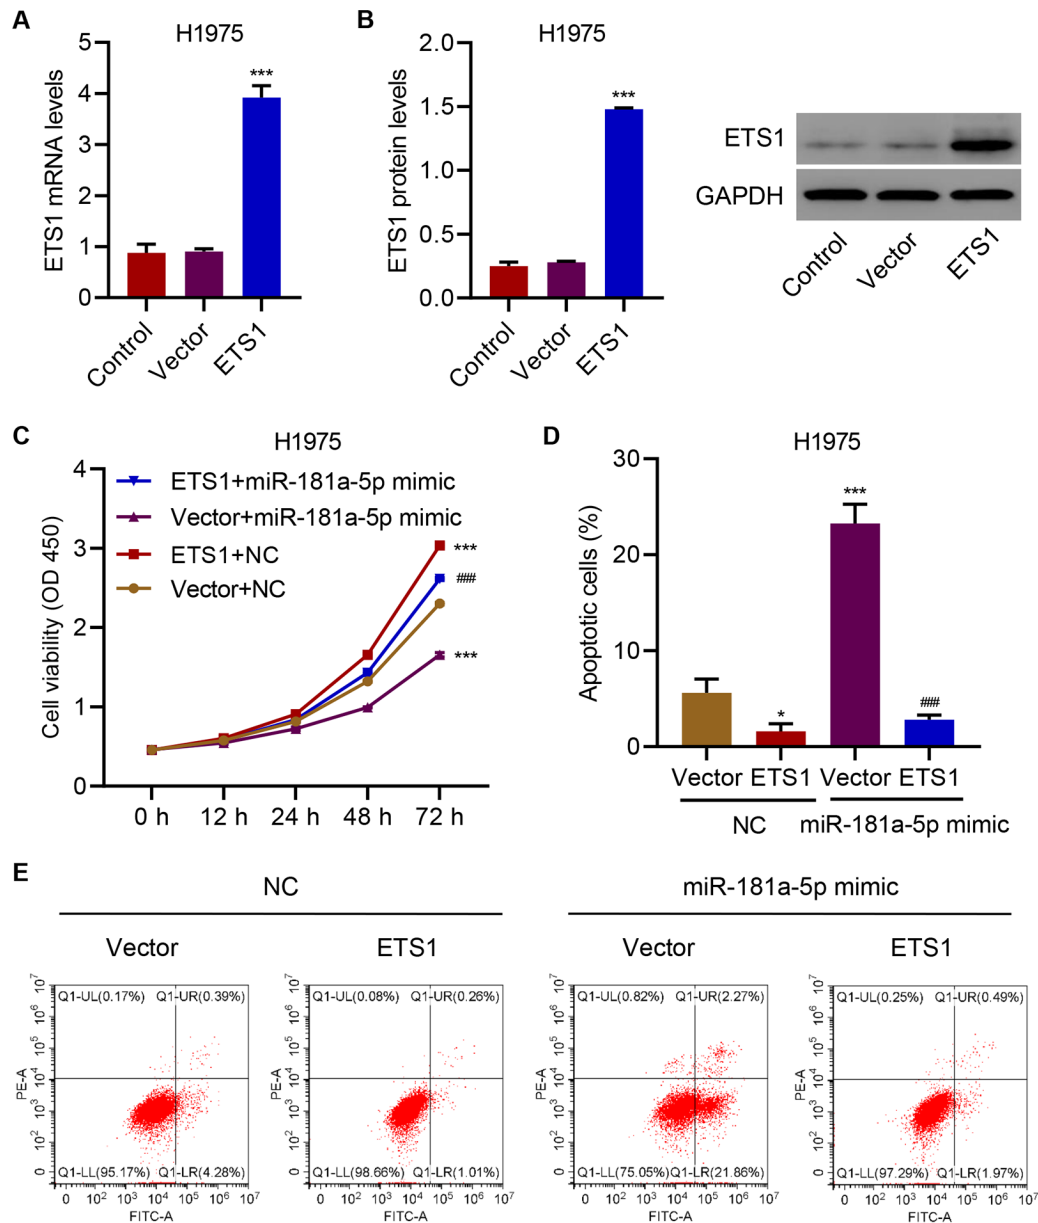

**Figure S6. miR-181a-5p regulates cell viability and apoptosis by targeting ETS1.** (A-B) ETS1 expression in H1975 cells transduced with ETS1 expression vector. (C) Cell viability and (D-E) apoptosis in H1975 cells transfected with miR-181a-5p mimic and transduced with ETS1 expression vector. \*\*\* $P < 0.001$  compared with vector or vector+NC. ### $P < 0.001$  compared with Vector+miR-181a-5p mimic.
